# Supplementary material for: Side Effects of COVID-19 Vaccines Primer Doses: Experience of Saudi Healthcare Workers Participating in CoVaST-SA
Source: MDPI journal article supplement (doi:10.3390/vaccines10122137), 2022-12-13
Supplement: s1 [file s1]

**Table S1.** Anamnestic Characteristics of Saudi Healthcare Workers Responding to CoVaST-SA, (*n* = 1039)

1

| Variable          | Outcome                | Female<br>( <i>n</i> = 729) | Male<br>( <i>n</i> = 310) | Total<br>( <i>n</i> = 1039) | Sig.              |
|-------------------|------------------------|-----------------------------|---------------------------|-----------------------------|-------------------|
| Chronic Illnesses | Allergy                | 22 (3%)                     | 4 (1.3%)                  | 26 (2.5%)                   | 0.103             |
|                   | Asthma                 | 31 (4.3%)                   | 12 (3.9%)                 | 43 (4.1%)                   | 0.778             |
|                   | Blood Disease          | 9 (1.2%)                    | 0 (0%)                    | 9 (0.9%)                    | 0.065 *           |
|                   | Bowel Disease          | 3 (0.4%)                    | 0 (0%)                    | 3 (0.3%)                    | 0.559 *           |
|                   | Cancer                 | 2 (0.3%)                    | 0 (0%)                    | 2 (0.2%)                    | 1.000 *           |
|                   | Cardiac Disease        | 1 (0.1%)                    | 2 (0.6%)                  | 3 (0.3%)                    | 0.214 *           |
|                   | Chronic Hypertension   | 31 (4.3%)                   | 22 (7.1%)                 | 53 (5.1%)                   | 0.057             |
|                   | Diabetes Mellitus I    | 9 (1.2%)                    | 4 (1.3%)                  | 13 (1.3%)                   | 1.000 *           |
|                   | Diabetes Mellitus II   | 12 (1.6%)                   | 9 (2.9%)                  | 21 (2%)                     | 0.188             |
|                   | Hepatologic Disease    | 2 (0.3%)                    | 1 (0.3%)                  | 3 (0.3%)                    | 1.000 *           |
|                   | Psychologic Distress   | 7 (1%)                      | 1 (0.3%)                  | 8 (0.8%)                    | 0.448 *           |
|                   | Neurologic Disease     | 8 (1.1%)                    | 0 (0%)                    | 8 (0.8%)                    | 0.114 *           |
|                   | Ophthalmologic Disease | 1 (0.1%)                    | 0 (0%)                    | 1 (0.1%)                    | 1.000 *           |
|                   | Renal Disease          | 2 (0.3%)                    | 2 (0.6%)                  | 4 (0.4%)                    | 0.587 *           |
|                   | Rheumatoid Arthritis   | 9 (1.2%)                    | 0 (0%)                    | 9 (0.9%)                    | 0.065 *           |
|                   | Thyroid Disease        | 32 (4.4%)                   | 2 (0.6%)                  | 34 (3.3%)                   | <b>0.002</b>      |
|                   | Other                  | 31 (4.3%)                   | 11 (3.5%)                 | 42 (4%)                     | 0.598             |
|                   | Total                  | 135 (18.5%)                 | 53 (17.1%)                | 188 (18.1%)                 | 0.586             |
| Medications       | Anti-asthmatic         | 18 (2.5%)                   | 9 (2.9%)                  | 27 (2.6%)                   | 0.687             |
|                   | Antibiotics            | 6 (0.8%)                    | 2 (0.6%)                  | 8 (0.8%)                    | 1.000 *           |
|                   | Anticoagulants         | 5 (0.7%)                    | 2 (0.6%)                  | 7 (0.7%)                    | 1.000 *           |
|                   | Antidepressants        | 15 (2.1%)                   | 9 (2.9%)                  | 24 (2.3%)                   | 0.406             |
|                   | Antidiabetics          | 20 (2.7%)                   | 11 (3.5%)                 | 31 (3%)                     | 0.485             |
|                   | Antiepileptics         | 5 (0.7%)                    | 0 (0%)                    | 5 (0.5%)                    | 0.330 *           |
|                   | Antihistamine          | 18 (2.5%)                   | 4 (1.3%)                  | 22 (2.1%)                   | 0.227             |
|                   | Antihypertensive       | 37 (5.1%)                   | 24 (7.7%)                 | 61 (5.9%)                   | 0.094             |
|                   | Anti-reflux            | 21 (2.9%)                   | 11 (3.5%)                 | 32 (3.1%)                   | 0.569             |
|                   | Immunosuppressive      | 9 (1.2%)                    | 0 (0%)                    | 9 (0.9%)                    | 0.065 *           |
|                   | Cholesterol Lowering   | 14 (1.9%)                   | 18 (5.8%)                 | 32 (3.1%)                   | <b>&lt; 0.001</b> |
|                   | Common Analgesics      | 19 (2.6%)                   | 3 (1%)                    | 22 (2.1%)                   | 0.093             |
|                   | Contraceptives         | 14 (1.9%)                   | 0 (0%)                    | 14 (1.3%)                   | <b>0.014 *</b>    |
|                   | Corticosteroids        | 3 (0.4%)                    | 1 (0.3%)                  | 4 (0.4%)                    | 1.000 *           |
|                   | NSAID                  | 14 (1.9%)                   | 3 (1%)                    | 17 (1.6%)                   | 0.268             |
|                   | Opioid Analgesics      | 1 (0.1%)                    | 0 (0%)                    | 1 (0.1%)                    | 1.000 *           |
|                   | Thyroid Hormones       | 35 (4.8%)                   | 4 (1.3%)                  | 39 (3.8%)                   | <b>0.006</b>      |
|                   | Other                  | 37 (5.1%)                   | 8 (2.6%)                  | 45 (4.3%)                   | 0.071             |
|                   | Total                  | 182 (25%)                   | 72 (23.2%)                | 254 (24.4%)                 | 0.550             |
| Tobacco Smoking   | Yes                    | 17 (2.3%)                   | 69 (22.3%)                | 86 (8.3%)                   | <b>&lt; 0.001</b> |

|                                         |                                   |                  |                  |                  |              |
|-----------------------------------------|-----------------------------------|------------------|------------------|------------------|--------------|
| COVID-19 Infection                      | No                                | 712 (97.7%)      | 241 (77.7%)      | 953 (91.7%)      |              |
|                                         | Daily Cigarettes ( $\mu \pm SD$ ) | 6.24 $\pm$ 5.75  | 14.06 $\pm$ 8.99 | 12.51 $\pm$ 8.99 | <b>0.001</b> |
|                                         | Yes <sup>†</sup>                  | 156 (21.4%)      | 63 (20.3%)       | 219 (21.1%)      |              |
|                                         | No                                | 573 (78.6%)      | 247 (79.7%)      | 820 (78.9%)      | 0.697        |
| <sup>†</sup> Infection Onset            | Before First Dose                 | 107 (68.6%)      | 39 (61.9%)       | 146 (66.7%)      | 0.342        |
|                                         | After First Dose                  | 21 (13.5%)       | 14 (22.2%)       | 35 (16%)         | 0.109        |
|                                         | After Second Dose                 | 28 (17.9%)       | 10 (15.9%)       | 38 (17.4%)       | 0.713        |
| <sup>†</sup> Infection Duration         | $\mu \pm SD$                      | 9.24 $\pm$ 11.17 | 9.60 $\pm$ 9.73  | 9.35 $\pm$ 10.76 | 0.992        |
| <sup>†</sup> Infection Severity         | Mild                              | 103 (66%)        | 37 (58.7%)       | 140 (63.9%)      | 0.309        |
|                                         | Moderate                          | 50 (32.1%)       | 25 (39.7%)       | 75 (34.2%)       | 0.281        |
|                                         | Severe                            | 3 (1.9%)         | 1 (1.6%)         | 4 (1.8%)         | 1.000 *      |
| <sup>†</sup> Infection Signs & Symptoms | Fever / Chills                    | 82 (52.8%)       | 41 (65.1%)       | 123 (56.2%)      | 0.091        |
|                                         | Cough                             | 66 (42.3%)       | 34 (54%)         | 100 (45.7%)      | 0.117        |
|                                         | Dyspnea                           | 42 (26.9%)       | 13 (20.6%)       | 55 (25.1%)       | 0.331        |
|                                         | Fatigue                           | 113 (72.4%)      | 52 (82.5%)       | 165 (75.3%)      | 0.116        |
|                                         | Myalgia                           | 113 (72.4%)      | 42 (66.7%)       | 155 (70.8%)      | 0.395        |
|                                         | Headache                          | 100 (64.1%)      | 45 (71.4%)       | 145 (66.2%)      | 0.299        |
|                                         | Smell / Taste Loss                | 99 (63.5%)       | 39 (61.9%)       | 138 (63%)        | 0.829        |
|                                         | Sore Throat                       | 62 (39.7%)       | 19 (30.2%)       | 81 (37%)         | 0.184        |
|                                         | Runny Nose                        | 79 (50.6%)       | 27 (42.9%)       | 106 (48.4%)      | 0.297        |
|                                         | Nausea / Vomiting                 | 34 (21.8%)       | 5 (6.3%)         | 38 (17.4%)       | <b>0.006</b> |
|                                         | Diarrhoea                         | 37 (23.7%)       | 10 (15.9%)       | 47 (21.5%)       | 0.201        |
|                                         | Other                             | 22 (14.1%)       | 3 (4.8%)         | 25 (11.4%)       | <b>0.049</b> |

Chi-squared ( $\chi^2$ ), Fisher's exact (\*) and Mann-Whitney (U) tests were used with a significance level (Sig.) < 0.05
